# Supplementary material
Source: PubMed Central journal article supplement (PMC5758392)

**Beta-caryophyllene protects against alcoholic steatohepatitis by attenuating inflammation and metabolic dysregulation**

Running Title: Beta-caryophyllene is hepatoprotective

Zoltan V. Varga<sup>1</sup>, Csaba Matyas<sup>1</sup>, Katalin Erdelyi<sup>1</sup>, Resat Cinar<sup>2</sup>, Daniela Nieri<sup>3</sup>, Andrea Chicca<sup>3</sup>, Balazs Tamas Nemeth<sup>1</sup>, Janos Paloczi<sup>1</sup>, Tamas Lajtos<sup>1</sup>, Lukas Corey<sup>1</sup>, Gyorgy Hasko<sup>4</sup>, Bin Gao<sup>5</sup>, George Kunos<sup>2</sup>, Jürg Gertsch<sup>3</sup> and Pal Pacher<sup>1</sup>

**Affiliations:**

<sup>1</sup>Laboratory of Cardiovascular Physiology and Tissue Injury, National Institutes of Health/NIAAA, Bethesda, MD 20852, USA.

<sup>2</sup>Laboratory of Physiologic Studies, National Institutes of Health/NIAAA, Bethesda, MD 20852, USA.

<sup>3</sup>Institute of Biochemistry and Molecular Medicine, National Center of Competence in Research TransCure, University of Bern, CH-3012 Bern, Switzerland.

<sup>4</sup>Departments of Surgery, Rutgers New Jersey Medical School, Newark, NJ 07103, USA.

<sup>5</sup>Laboratory of Liver Diseases, National Institutes of Health/NIAAA, Bethesda, MD 20852, USA.

**Contact:**

Pal Pacher, MD, PhD, FAHA, FACC

Laboratory of Cardiovascular Physiology and Tissue Injury

5625 Fishers Lane, Room 2N-17; Bethesda, MD 20892-9413

Phone: (301)443-4830 Email: [pacher@mail.nih.gov](mailto:pacher@mail.nih.gov)

**Conflict of interest disclosure:** All Authors declare no conflict of interest.

**Supplementary Table 1.**

Primer sequences used in the present study

| <b>Gene symbol</b> | <b>Accession number</b> | <b>Forward primer</b>        | <b>Reverse primer</b>     |
|--------------------|-------------------------|------------------------------|---------------------------|
| Actb/B-actin       | NM_007393.5             | CACCCGCGAGCACAGCTTCTT        | TTTGACATGCCGGAGCCGTT      |
| RPLP0              | NM_007475.5             | TCCAGGCTTTGGGCATCA           | CTTTATCAGCTGCACATCACTCAGA |
| TNFA               | NM_013693.3             | TCTCATTCCTGCTTGTGGCAG        | TCCACTTGGTGGTTTGCTACG     |
| II1B               | NM_008361.4             | TGCCACCTTTTGACAGTGATGA       | AGGTCCACGGGAAAGACACA      |
| ICAM1/CD54         | NM_010493.2             | AACTTTTCAGCTCCGGTCCTG        | TCAGTGTGAATTGGACCTGCG     |
| F4/80/Adgre1       | NM_010130.4             | CTTTGGCTATGGGCTTCCAGTC       | GCAAGGAGGACAGAGTTTATCGTG  |
| CD68               | NM_001291058.1          | TGCGGCTCCCTGTGTGT            | TCTTCCTCTGTTCCCTGGGCTAT   |
| Iba-1/AIF1         | NM_019467.2             | CAGACTGCCAGCCTAAGACA         | AGGAATTGCTTGTTGATCCC      |
| CD11b/Itgam        | NM_001082960.1          | GGATCCGGAAAGTAGTGAGAGAA<br>C | CCGAATTTTTCTCCATCTGTGAT   |
| Il6                | NM_001314054.1          | AACCACGGCCTTCCCTACTT         | TGCCATTGCACAACCTCTTTTCTC  |
| CCL2/MCP-1         | NM_011333.3             | GGCTCAGCCAGATGCAGTTA         | TCCTTCTTGGGGTCAGCACA      |
| CCL4/MIP-1b        | NM_013652.2             | CTGTGCAAACCTAACCCCGA         | ATACCACAGCTGGCTTGGAG      |
| CXCL2/MIP-2        | NM_009140.2             | AGTGAACCTGCGCTGTCAATGC       | AGGCAAACCTTTTGACCGCC      |
| Arg1               | NM_007482.3             | TTTTAGGGTTACGGCCGGTG         | CCTCGAGGCTGTCCTTTTGA      |
| Mrc2               | NM_008626.3             | CAGACTGCCAGCCTAAGACA         | AGGAATTGCTTGTTGATCCC      |
| Mgl1/Clec10a       | NM_001204252.1          | AAGAACAACGGCTCGGAAGTGG       | GAGCTCCTAGCTCTCCTTGGC     |

|                |                |                               |                                 |
|----------------|----------------|-------------------------------|---------------------------------|
| CD163          | NM_001170395.1 | GCCTCTGCTGTCACCTAACGC         | AGATCCATCTGAGCAGGTCCT           |
| Clec7a         | NM_001309637.1 | GGCGACACAATTCAGGGAGA          | AGTTTGGGATGCCTTGGAGG            |
| IL10           | NM_010548.2    | GGCGCTGTCATCGATTTCTC          | GCCTTGTAGACACCTTGGTCTTG         |
| Ly6G           | NM_001310438.1 | TGCGTTGCTCTGGAGATAGA          | CAGAGTAGTGGGGCAGATGG            |
| SELE           | NM_011345.2    | AGCAGAGTTTCACGTTGCAGG         | TGGCGCAGATAAAGGCTTCA            |
| SELP           | NM_011347.2    | GCCAGTTCATGTGCGATGAA          | GGCGAAGATTCCTGGACACTT           |
| Ppara          | NM_001113418.1 | TCGGCCTGGCCTTCTAAACATAG       | TCTTGCAACAGTGGGTGCAGCG          |
| Pparg          | NM_001127330.2 | CTGTGGACCTCTCCGTGATG          | GCCTGTTGTAGAGCTGGGTC            |
| Ppard          | NM_011145.3    | ATCGTCAACAAAGACGGGCT          | GCTTCTACCTGGGGCACATT            |
| Ppargc1a/PGC1a | NM_008904.2    | AGACAGGTGCCTTCAGTTCAC         | AGCAGCACACTCTATGTCCT            |
| Ppargc1b/PGC1b | NM_133249.2    | TGGAGACTGCTCTGGAAGGT          | TGCTGCTGTCCTCAAATACG            |
| G6PC           | NM_008061.4    | AAAGTCAACCGCCATGCAAAGGA<br>C  | TAGCAAAGAAAGACAGGGCTACCAG       |
| Pck1/PEPCK     | NM_011044.2    | GGAAGGACAAAGATGGCAAGTTC       | AGGCGTTTTCTTAGGGATGTAG          |
| PFK            | NM_001163487.1 | CTCCTCCCCGTGTTTCGCCAAG        | TGCCACCCAGCTGAAGCATCATAG        |
| HMGCS2         | NM_008256.4    | TGGTTCAAGACAGGGACACAGAA<br>C  | AGAGGAATACCAGGGCCCAACAAT        |
| FGF21          | NM_020013.4    | CCAGATGTGGGCTCCT              | AGAAACAGCCCTAGATTCAGGAAGA<br>GT |
| SIRT1          | NM_019812.3    | TGTGAAGTTACTGCAGGAGTGTA<br>AA | GCATAGATACCGTCTCTTGATCTGAA      |

### **Legends for Supplementary figures**

#### **Supplementary Figure 1.**

Supplementary Fig.1 shows colocalization of the two utilized macrophage marker, F4/80 and Iba-1. F4/80 stains the cell membrane of macrophages, while Iba-1 as an actin-binding protein gives a detailed picture of cytoskeletal organization and cell shape. The two markers are highly colocalized.

A

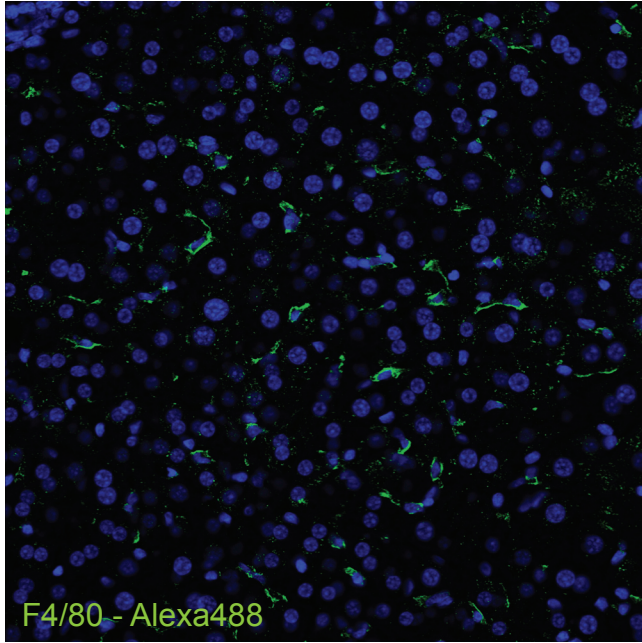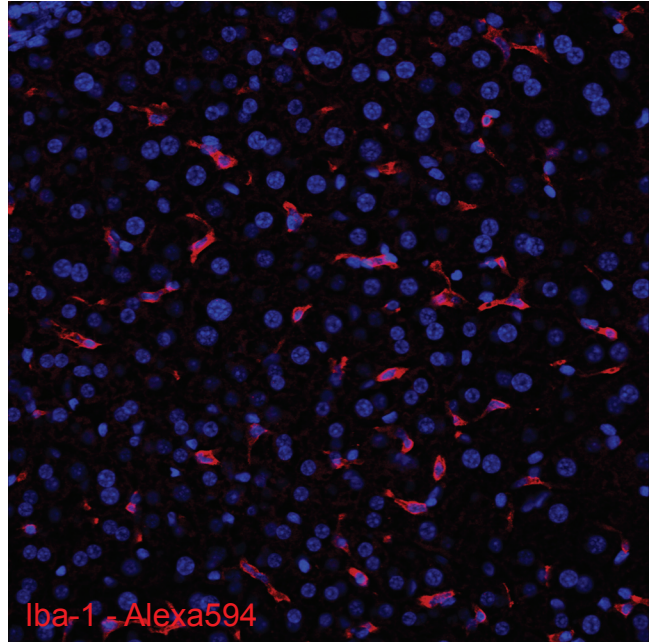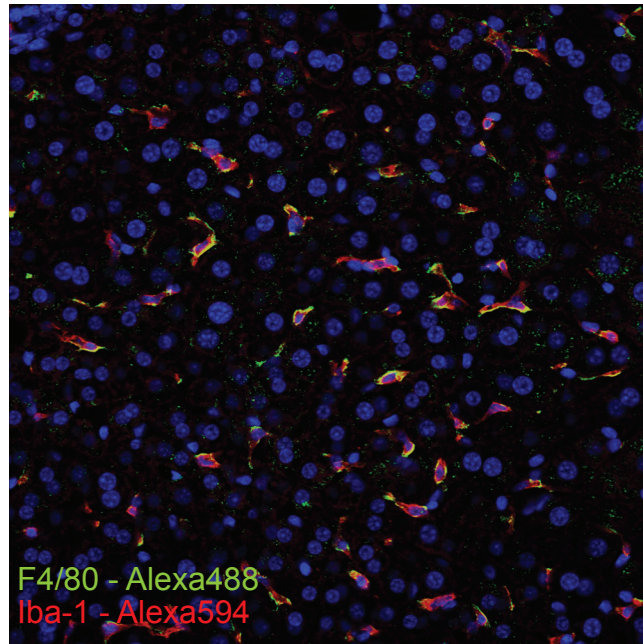

Supplement: BPH-175-320-s002.pdf [file BPH-175-320-s002.pdf]
