# Supplementary material
Source: PubMed Central journal article supplement (PMC5758392)

A

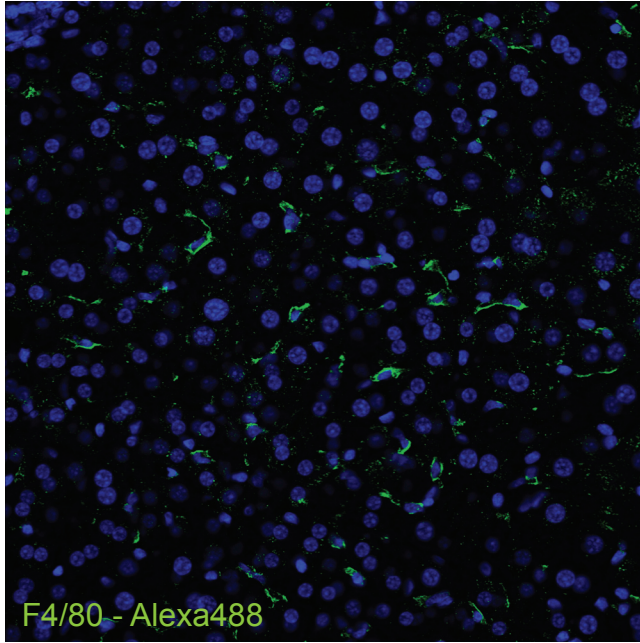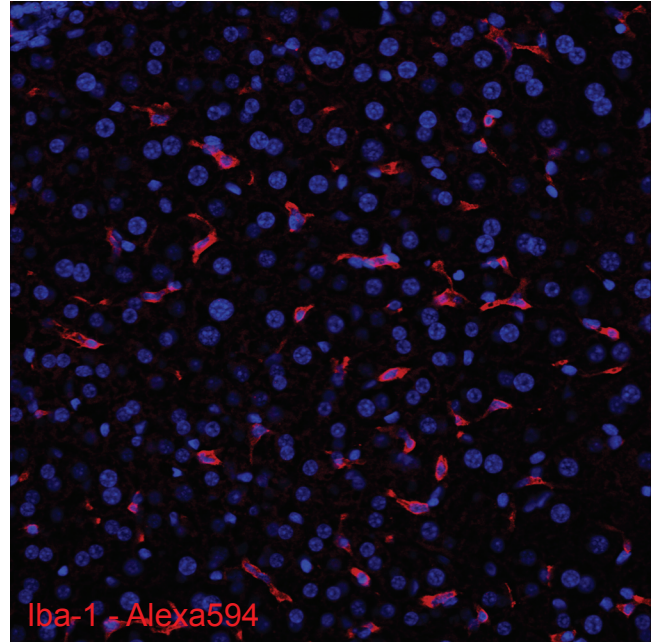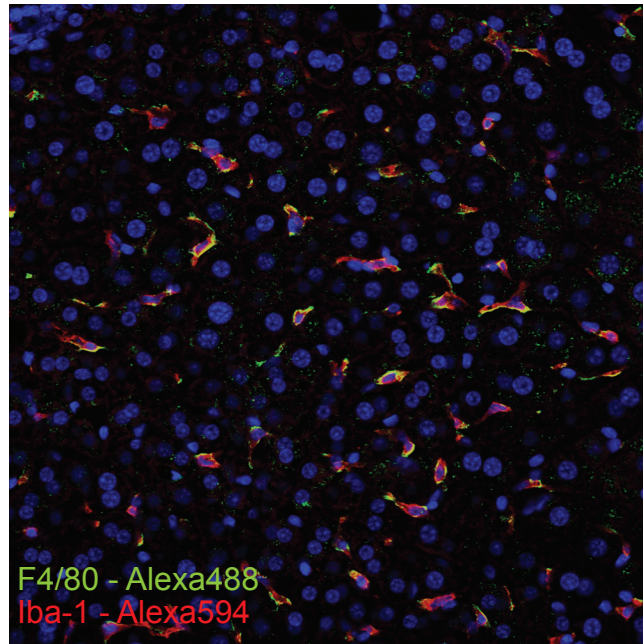

Supplement: BPH-175-320-s001.pdf [file BPH-175-320-s001.pdf]
